# Supplementary material
Source: PubMed Central journal article supplement (PMC8084205)
Supplement: NIHMS1677495-supplement-1677495_Supp_Tab1-6.pdf [file NIHMS1677495-supplement-1677495_Supp_Tab1-6.pdf]

**Supplementary Table 1.** Collapsing models and statistical results of *PHGDH* variants in each model.

|                          | Model 1a               | Model 1b             | Model 2a              | Model 2b             | Model 3a             | Model 3b              |
|--------------------------|------------------------|----------------------|-----------------------|----------------------|----------------------|-----------------------|
|                          | Ultra Rare<br>Polyphen | Ultra Rare<br>REVEL  | Very Rare<br>Polyphen | Very Rare<br>REVEL   | Rare<br>Polyphen     | Rare<br>REVEL         |
| gnomAD AF                | 0                      | 0                    | 0.00005               | 0.00005              | 0.001                | 0.001                 |
| Qualified PHGDH variants |                        |                      |                       |                      |                      |                       |
| MacTel (793)             | 3                      | 5                    | 12                    | 14                   | 22                   | 25                    |
| control (17610)          | 9                      | 13                   | 33                    | 37                   | 87                   | 98                    |
| Odds Ratio               | 7.5                    | 8.6                  | 8.2                   | 8.5                  | 5.8                  | 5.8                   |
| FET P                    | $1.3 \times 10^{-2}$   | $7.9 \times 10^{-4}$ | $2.9 \times 10^{-7}$  | $2.0 \times 10^{-8}$ | $1.2 \times 10^{-9}$ | $7.5 \times 10^{-11}$ |

Odds Ratio and FET P (p-value obtained by the Fisher's Exact Test) are determined from the numbers of qualified variants, either PolyPhen as "probably pathogenic" or REVEL >0.5, in each model that included all classes of variants (missense, nonsense, indel, splicing-affecting, etc.).

**Supplementary Table 2.** Selected candidate genes for association with MacTel based on functional role in sphingolipid and/or serine metabolism pathways

| Gene    | Name                                                             | Collapsing<br>FET P | Collapsing<br>OR | Collapsing<br>Model | Collapsing<br>Rank | Selection<br>Criteria |
|---------|------------------------------------------------------------------|---------------------|------------------|---------------------|--------------------|-----------------------|
| SGPP2   | sphingosine-1-phosphate phosphatase 2                            | 0.0026              | 4.2              | 3a                  | 46                 | SPH                   |
| ALDH1A1 | aldehyde dehydrogenase 1 family member A1                        | 0.0038              | 13.4             | 1b                  | 22                 | SPH                   |
| CERS1   | ceramide synthase 1                                              | 0.0045              | 5.3              | 2b                  | 29                 | SPH Serine            |
| GAL3ST2 | galactose-3-O-sulfotransferase 2                                 | 0.0110              | 2.5              | 3a                  | 159                | SPH                   |
| DGAT1   | diacylglycerol O-acyltransferase 1                               | 0.0218              | 2.9              | 2a                  | 131                | SPH                   |
| SMPD3   | sphingomyelin phosphodiesterase 3                                | 0.0218              | 2.9              | 3b                  | 198                | SPH Serine            |
| CBS     | cystathionine-beta-synthase                                      | 0.0246              | 5.6              | 1a                  | 112                | Serine                |
| FAM57B  | family with sequence similarity 57 member B                      | 0.0248              | 11.0             | 1a                  | 141                | SPH                   |
| ENPP6   | ectonucleotide<br>pyrophosphatase/phosphodiesterase 6            | 0.0258              | 2.8              | 2b                  | 146                | SPH                   |
| ST8SIA5 | ST8 alpha-N-acetyl-neuraminide alpha-2,8-<br>sialyltransferase 5 | 0.0280              | 2.8              | 3a                  | 391                | SPH                   |
| SLC27A4 | solute carrier family 27 member 4                                | 0.0280              | 2.8              | 3b                  | 260                | SPH                   |
| KDSR    | 3-ketodihydrosphingosine reductase                               | 0.0328              | 2.7              | 3b                  | 289                | SPH Serine            |
| NPC1L1  | NPC1 like intracellular cholesterol transporter<br>1             | 0.0398              | 2.9              | 1a                  | 215                | SPH                   |
| ELOVL5  | ELOVL fatty acid elongase 5                                      | 0.0433              | 2.8              | 3a                  | 592                | SPH                   |
| SGPP2   | sphingosine-1-phosphate phosphatase 2                            | 0.0473              | 3.1              | 2a                  | 345                | SPH                   |
| SPNS1   | sphingolipid transporter 1 (putative)                            | 0.0479              | 2.2              | 3a                  | 665                | SPH                   |

Variants with PolyPhen predicted to be “possibly pathogenic” or REVEL>0.5 were considered as “qualified” for collapsing analyses. Selections are based on FET P<0.05 in at least one of six collapsing models and association with sphingosine metabolism (SPH), or serine metabolism (Serine). See Supplementary Table 1 for collapsing models.

**Supplementary Table 3.** Relative gene expression between human cadaveric Retina and RPE. Positive Log2FoldChange values represent elevated expression in the Retina. Raw data from Cherry, T.J. et al. 2020 PNAS<sup>1</sup>

| Gene   | baseMean | log2FoldChange | lfcSE | stat  | pvalue   | padj     |
|--------|----------|----------------|-------|-------|----------|----------|
| RPE65  | 1480.31  | -5.62          | 0.70  | -8.00 | 1.29E-15 | 1.98E-14 |
| RHO    | 13708.80 | 4.36           | 0.46  | 9.44  | 3.57E-21 | 8.88E-20 |
| PHGDH  | 42.32    | -2.72          | 0.39  | -6.95 | 3.63E-12 | 3.94E-11 |
| PSPH   | 36.75    | -0.27          | 0.40  | -0.68 | 0.50     | 0.60     |
| PSAT1  | 38.92    | -2.01          | 0.53  | -3.79 | 0.00015  | 0.00056  |
| SHMT1  | 113.49   | -1.48          | 0.28  | -5.22 | 1.78E-07 | 1.06E-06 |
| SHMT2  | 114.13   | 0.35           | 0.34  | 1.05  | 0.30     | 0.41     |
| SPTLC1 | 394.66   | 0.03           | 0.22  | 0.13  | 0.89     | 0.92     |
| SLC1A4 | 318.82   | 0.01           | 0.30  | 0.35  | 0.72     | 0.79     |
| SLC1A5 | 38.19    | -3.03          | 0.37  | -8.19 | 2.64E-16 | 4.35E-15 |

**Supplementary Table 4. HSAN1 patient cohort**

| <b>Family and Patient #</b> | <b>MacTel Status</b> | <b>Relationship</b> | <b>Birth Year</b> | <b>gender</b> | <b>ethnicity</b> | <b>WES</b> |
|-----------------------------|----------------------|---------------------|-------------------|---------------|------------------|------------|
| HSAN1 patient I             | MacTel/HSAN1         | proband             | 1994              | M             | Caucasian        | Y          |
| HSAN1 patient II            | MacTel/HSAN2         | father              | 1965              | M             | Caucasian        | Y          |
| patient VII                 | non                  | NA                  | 1949              | M             | Caucasian        |            |
| patient VIII                | non                  | NA                  | 1930              | F             | Caucasian        |            |

**Supplementary Table 5. Primers for qPCR**

|        |         |                         |
|--------|---------|-------------------------|
| PSPH   | Forward | GAGGACGCGGTGTCAGAAAT    |
|        | Reverse | GGTTGCTCTGCTATGAGTCTCT  |
| SHMT1  | Forward | CTGGCACAACCCCTCAAAGA    |
|        | Reverse | AGGCAATCAGCTCCAATCCAA   |
| SHMT2  | Forward | CCCTTCTGCAACCTCACGAC    |
|        | Reverse | TGAGCTTATAGGGCATAGACTCG |
| PHGDH  | Forward | CTGCGGAAAGTGCTCATCAGT   |
|        | Reverse | TGGCAGAGCGAACAATAAGGC   |
| PSAT1  | Forward | TGCCGCACTCAGTGTTGTTAG   |
|        | Reverse | GCAATTCCCGCACAAAGATTCT  |
| ATF4   | Forward | ATGACCGAAATGAGCTTCCTG   |
|        | Reverse | GCTGGAGAACCCATGAGGT     |
| SLC1A4 | Forward | TGTTTGCTCTGGTGTTAGGAGT  |
|        | Reverse | CGCCTCGTTGAGGGAATTGAA   |
| SLC1A5 | Forward | GAGCTGCTTATCCGCTTCTTC   |
|        | Reverse | GGGGCGTACCACATGATCC     |
| 36B4   | Forward | GAAGCCACGCTGCTGAACAT    |
|        | Reverse | CAAGGCCAGGACTCGTTTGTA   |

**Supplementary Table 6.** Formulation of Custom KSR

|                                            | mg/L  |
|--------------------------------------------|-------|
| L-Histidine                                | 940   |
| L-Isoleucine                               | 3400  |
| L-Methionine                               | 90    |
| L-Phenylalanine                            | 1800  |
| L-Proline                                  | 4000  |
| L-Hydroxyproline                           | 100   |
| L-Threonine                                | 2200  |
| L-Tryptophan                               | 440   |
| L-Tyrosine                                 | 77    |
| L-Valine                                   | 2400  |
| Thiamine                                   | 33    |
| Reduced glutathione                        | 10    |
| Ascorbic acid-2-PO4 (Mg Salt)              | 330   |
| Transferrin (iron sat)                     | 55    |
| Insulin                                    | 100   |
| Sodium selenite                            | 0.07  |
| AlbuMAX                                    | 83000 |
|                                            |       |
| Trace elements B (1x) Corning cat# C866M55 |       |
| Trace elements C (1x) Corning cat# C866M56 |       |

## References

1. Cherry, T.J. *et al.* Mapping the cis-regulatory architecture of the human retina reveals noncoding genetic variation in disease. *Proc Natl Acad Sci U S A* **117**, 9001-9012 (2020).
