# Supplementary material
Source: PubMed Central journal article supplement (PMC8084205)

Extended Data Figure 2A, unmodified gel

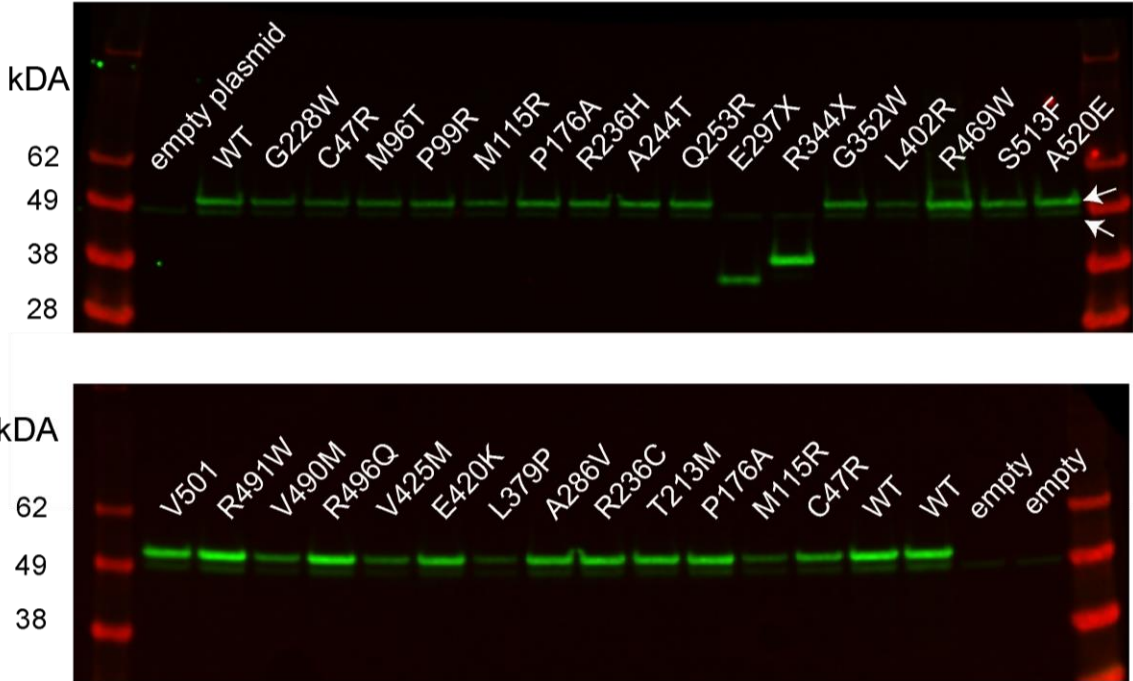

Supplement: NIHMS1677495-supplement-1677495_SourceData_ExtData_Fig2A.pdf [file NIHMS1677495-supplement-1677495_SourceData_ExtData_Fig2A.pdf]
